# Supplementary material for: Individual and organizational interventions to reduce burnout in resident physicians: a systematic review and meta-analysis
Source: PubMed Central journal article supplement (PMC11523819; doi:10.1186/s12909-024-06195-3), 2024-10-30

## Additional File 1.

### Individual and Organizational Interventions to Reduce Burnout in Resident Physicians: A Systematic Review and Meta-analysis

1. **Supplementary Appendix 1.** Searching syntax from (A) PubMed, (B) Embase, (C) Cochrane Library, (D) Scopus, (E) Sciencedirect
2. **Supplementary Appendix 2.1.** Subgroup meta-analysis of post-intervention standardized mean difference of EE score in individual intervention studies
3. **Supplementary Appendix 2.2.** Subgroup meta-analysis of post-intervention standardized mean difference of DP score in individual intervention studies
4. **Supplementary Appendix 2.3.** Subgroup meta-analysis of post-intervention standardized mean difference of PA score in individual intervention studies
5. **Supplementary Appendix 2.4.** Subgroup meta-analysis of post-intervention standardized mean difference of EE score in organizational intervention studies
6. **Supplementary Appendix 2.5.** Subgroup meta-analysis of post-intervention standardized mean difference of DP score in organizational intervention studies
7. **Supplementary Appendix 2.6.** Subgroup meta-analysis of post-intervention standardized mean difference of PA score in organizational intervention studies
8. **Supplementary Appendix 3.1.** Sensitivity analyses by leave-one-out method for standardized mean difference of EE score in individual intervention studies
9. **Supplementary Appendix 3.2.** Sensitivity analyses by leave-one-out method for standardized mean difference of DP score in individual intervention studies
10. **Supplementary Appendix 3.3.** Sensitivity analyses by leave-one-out method for standardized mean difference of PA score in individual intervention studies
11. **Supplementary Appendix 3.4.** Sensitivity analyses by leave-one-out method for standardized mean difference of EE score in organizational intervention studies
12. **Supplementary Appendix 3.5.** Sensitivity analyses by leave-one-out method for standardized mean difference of DP score in organizational intervention studies
13. **Supplementary Appendix 3.6.** Sensitivity analyses by leave-one-out method for standardized mean difference of PA score in organizational intervention studies
14. **Supplementary Appendix 4.1.** Funnel plot of standardized mean difference of EE score in individual intervention studies
15. **Supplementary Appendix 4.2.** Funnel plot of standardized mean difference of DP score in individual intervention studies
16. **Supplementary Appendix 4.3.** Funnel plot of standardized mean difference of PA score in individual intervention studies
17. **Supplementary Appendix 4.4.** Funnel plot of standardized mean difference of EE score in organizational intervention studies
18. **Supplementary Appendix 4.5.** Funnel plot of standardized mean difference of DP score in organizational intervention studies
19. **Supplementary Appendix 4.6.** Funnel plot of standardized mean difference of PA score in organizational intervention studies
20. **Supplementary Appendix 5.1.** Summary of the risk of bias assessment by Cochrane's RoB2 across 11 randomized controlled concurrent studies
21. **Supplementary Appendix 5.2.** Summary of the risk of bias assessment by Cochrane's ROBINS-I across 20 non-randomized studies

**Supplementary Appendix 1.** Searching syntax from (A) PubMed, (B) Embase, (C) Cochrane Library, (D) Scopus, (E) Sciencedirect

| Database                    | Step | Search algorithm                                                                                                                                                        | Items found<br>(August 26,<br>2024) |
|-----------------------------|------|-------------------------------------------------------------------------------------------------------------------------------------------------------------------------|-------------------------------------|
| <b>(A) Pubmed</b>           |      |                                                                                                                                                                         |                                     |
| Population                  | #1   | (residen* OR (residen* AND train*)) AND physician*                                                                                                                      | 47603                               |
| Outcome                     | #2   | burnout*                                                                                                                                                                | 30030                               |
|                             | #3   | psycho* AND burnout*                                                                                                                                                    | 21659                               |
|                             | #4   | #1 AND (#2 OR #3)                                                                                                                                                       | 1385                                |
|                             | #5   | mbi                                                                                                                                                                     | 5051                                |
|                             | #6   | maslach burnout inventor*                                                                                                                                               | 3750                                |
|                             | #7   | #5 OR #6                                                                                                                                                                | 7368                                |
|                             | #8   | #4 AND #7                                                                                                                                                               | 312                                 |
| <b>(B) Embase</b>           |      |                                                                                                                                                                         |                                     |
| Population                  | #1   | (residen* OR (residen* AND train*)) AND physician*                                                                                                                      | 65555                               |
| Outcome                     | #2   | burnout*                                                                                                                                                                | 39909                               |
|                             | #3   | psycho* AND burnout*                                                                                                                                                    | 20516                               |
|                             | #4   | #1 AND (#2 OR #3)                                                                                                                                                       | 2132                                |
|                             | #5   | mbi*                                                                                                                                                                    | 31681                               |
|                             | #6   | Maslach AND burnout AND inventor*                                                                                                                                       | 5416                                |
|                             | #7   | #5 OR #6                                                                                                                                                                | 39909                               |
|                             | #8   | #4 AND #7                                                                                                                                                               | 717                                 |
| Type of studies             | #9   | #8 AND ('cohort analysis'/de OR 'comparative study'/de OR 'controlled study'/de OR 'human experiment'/de OR 'prospective study'/de OR 'randomized controlled trial'/de) | 236                                 |
| Intervention and control    | #10  | #9                                                                                                                                                                      | 236                                 |
| <b>(C) Cochrane Library</b> |      |                                                                                                                                                                         |                                     |
| Population                  | #1   | ((residen* OR (residen* AND train*)) AND physician*)                                                                                                                    | 2495                                |
| Outcome                     | #2   | Burnout*                                                                                                                                                                | 1862                                |
|                             | #3   | Mbi*                                                                                                                                                                    | 1502                                |
|                             | #4   | Maslach AND burnout AND inventor*                                                                                                                                       | 336                                 |
|                             | #5   | (#3 OR #4)                                                                                                                                                              | 1694                                |
|                             | #6   | (#1 AND #5) AND trials                                                                                                                                                  | 32                                  |

| Database          | Step | Search algorithm                                   | Items found |
|-------------------|------|----------------------------------------------------|-------------|
| (D) Scopus        |      |                                                    |             |
|                   | #1   | (residen* OR (residen* AND train*)) AND physician* | 48582       |
|                   | #2   | burnout*                                           | 56756       |
|                   | #3   | psycho*                                            | 26501       |
|                   | #4   | #2 OR #3                                           | 26501       |
|                   | #5   | mbi*                                               | 18967       |
|                   | #6   | Maslach burnout inventor*                          | 5997        |
|                   | #7   | #5 OR #6                                           | 6036        |
|                   | #8   | #1 AND (#4 OR #7)                                  | 361         |
|                   | #9   | #8 AND "Limited to Article"                        | 325         |
| (E) Sciencedirect |      |                                                    |             |
|                   | #1   | resident                                           | 786408      |
|                   | #2   | burnout                                            | 55959       |
|                   | #3   | MBI                                                | 18117       |
|                   | #4   | Maslach burnout inventory                          | 3929        |
|                   | #5   | #1 AND #2 AND (#3 OR #4)                           | 1184        |
|                   | #6   | #5 AND research articles                           | 700         |
|                   | #7   | #6 AND medicine and dentistry                      | 589         |
|                   | #8   | #7 AND intervention                                | 378         |

**Supplementary Appendix 2.1.** Subgroup meta-analysis of post-intervention standardized mean difference of EE score in individual intervention studies

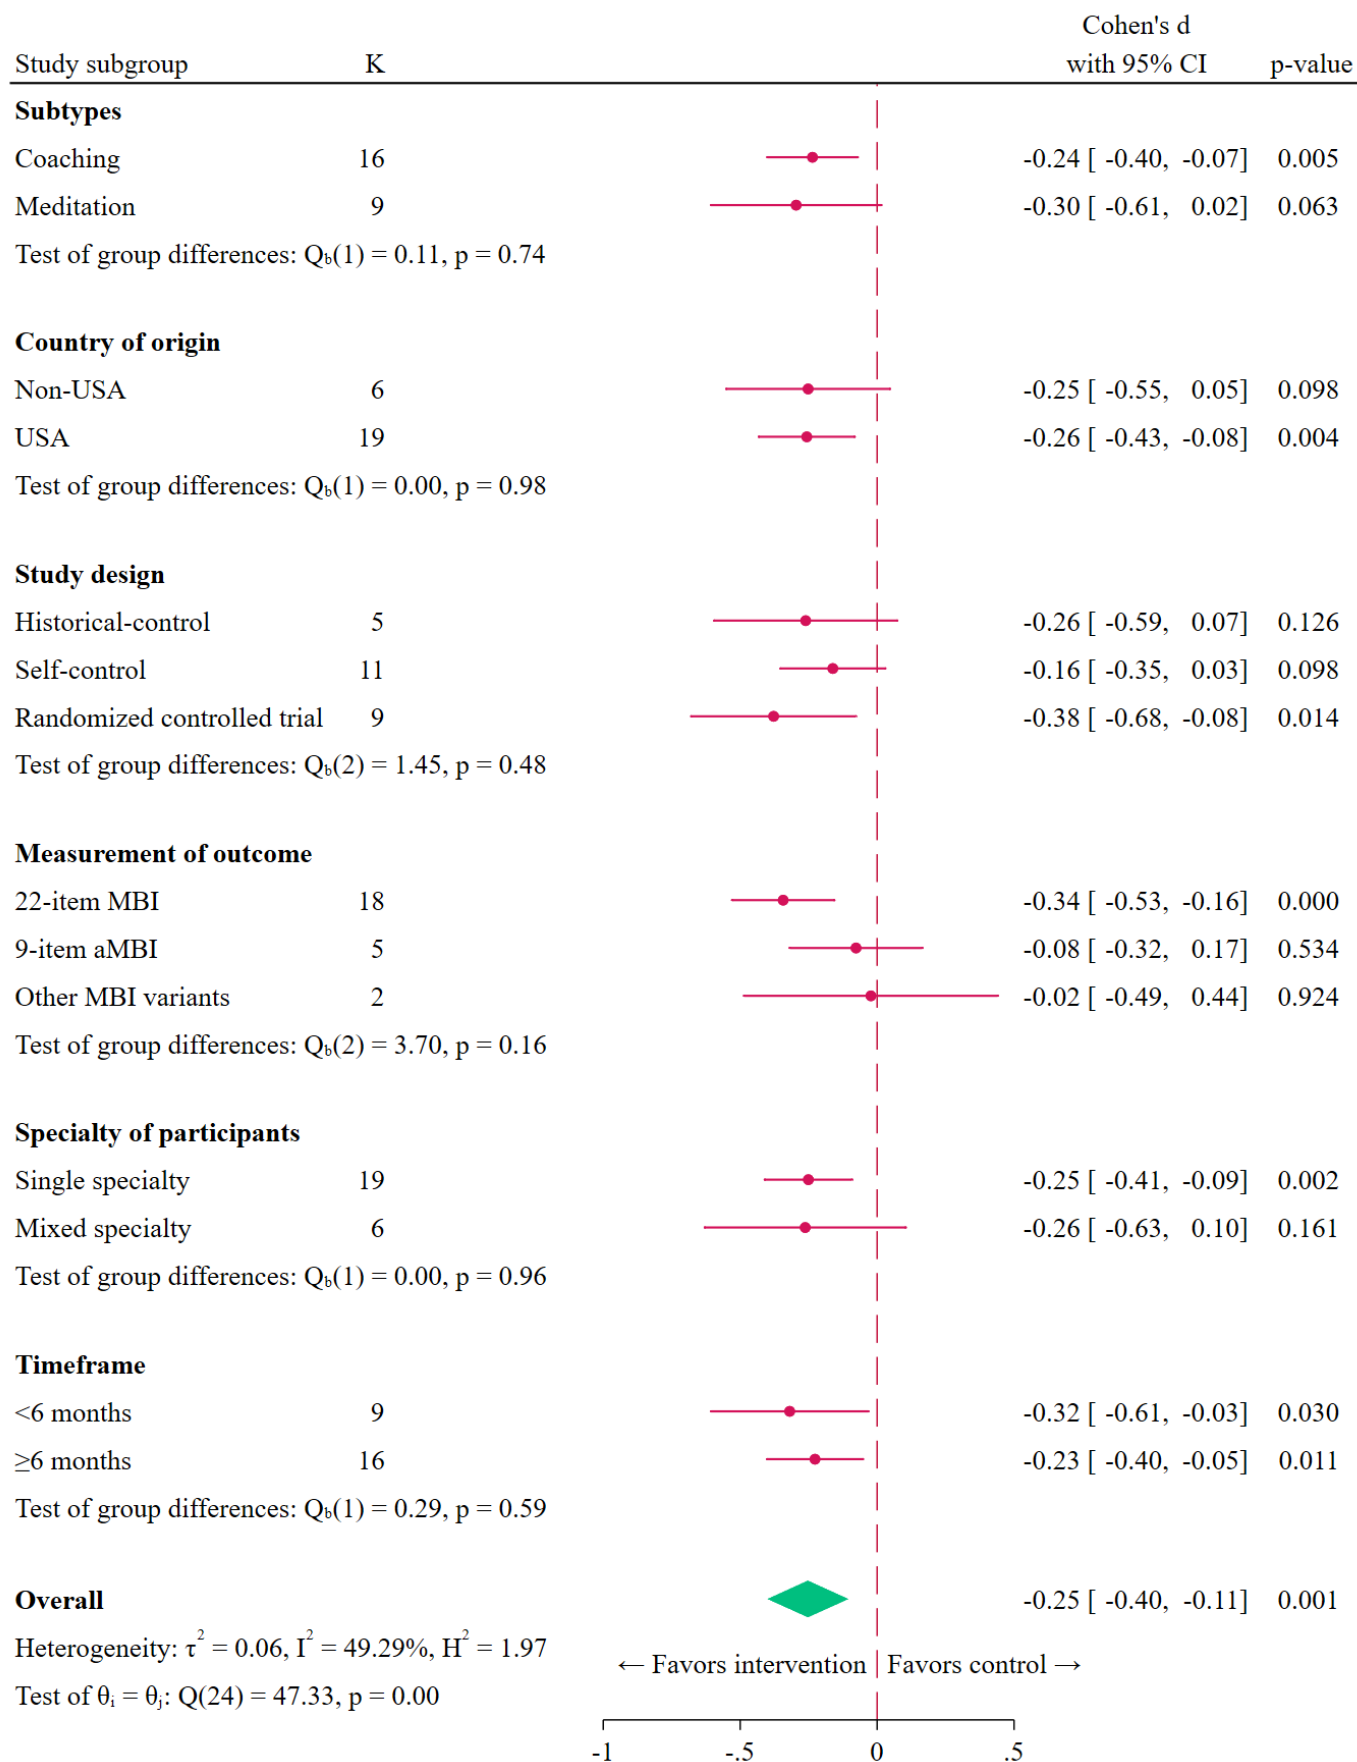

Random-effects DerSimonian–Laird model

**Supplementary Appendix 2.2.** Subgroup meta-analysis of post-intervention standardized mean difference of DP score in individual intervention studies

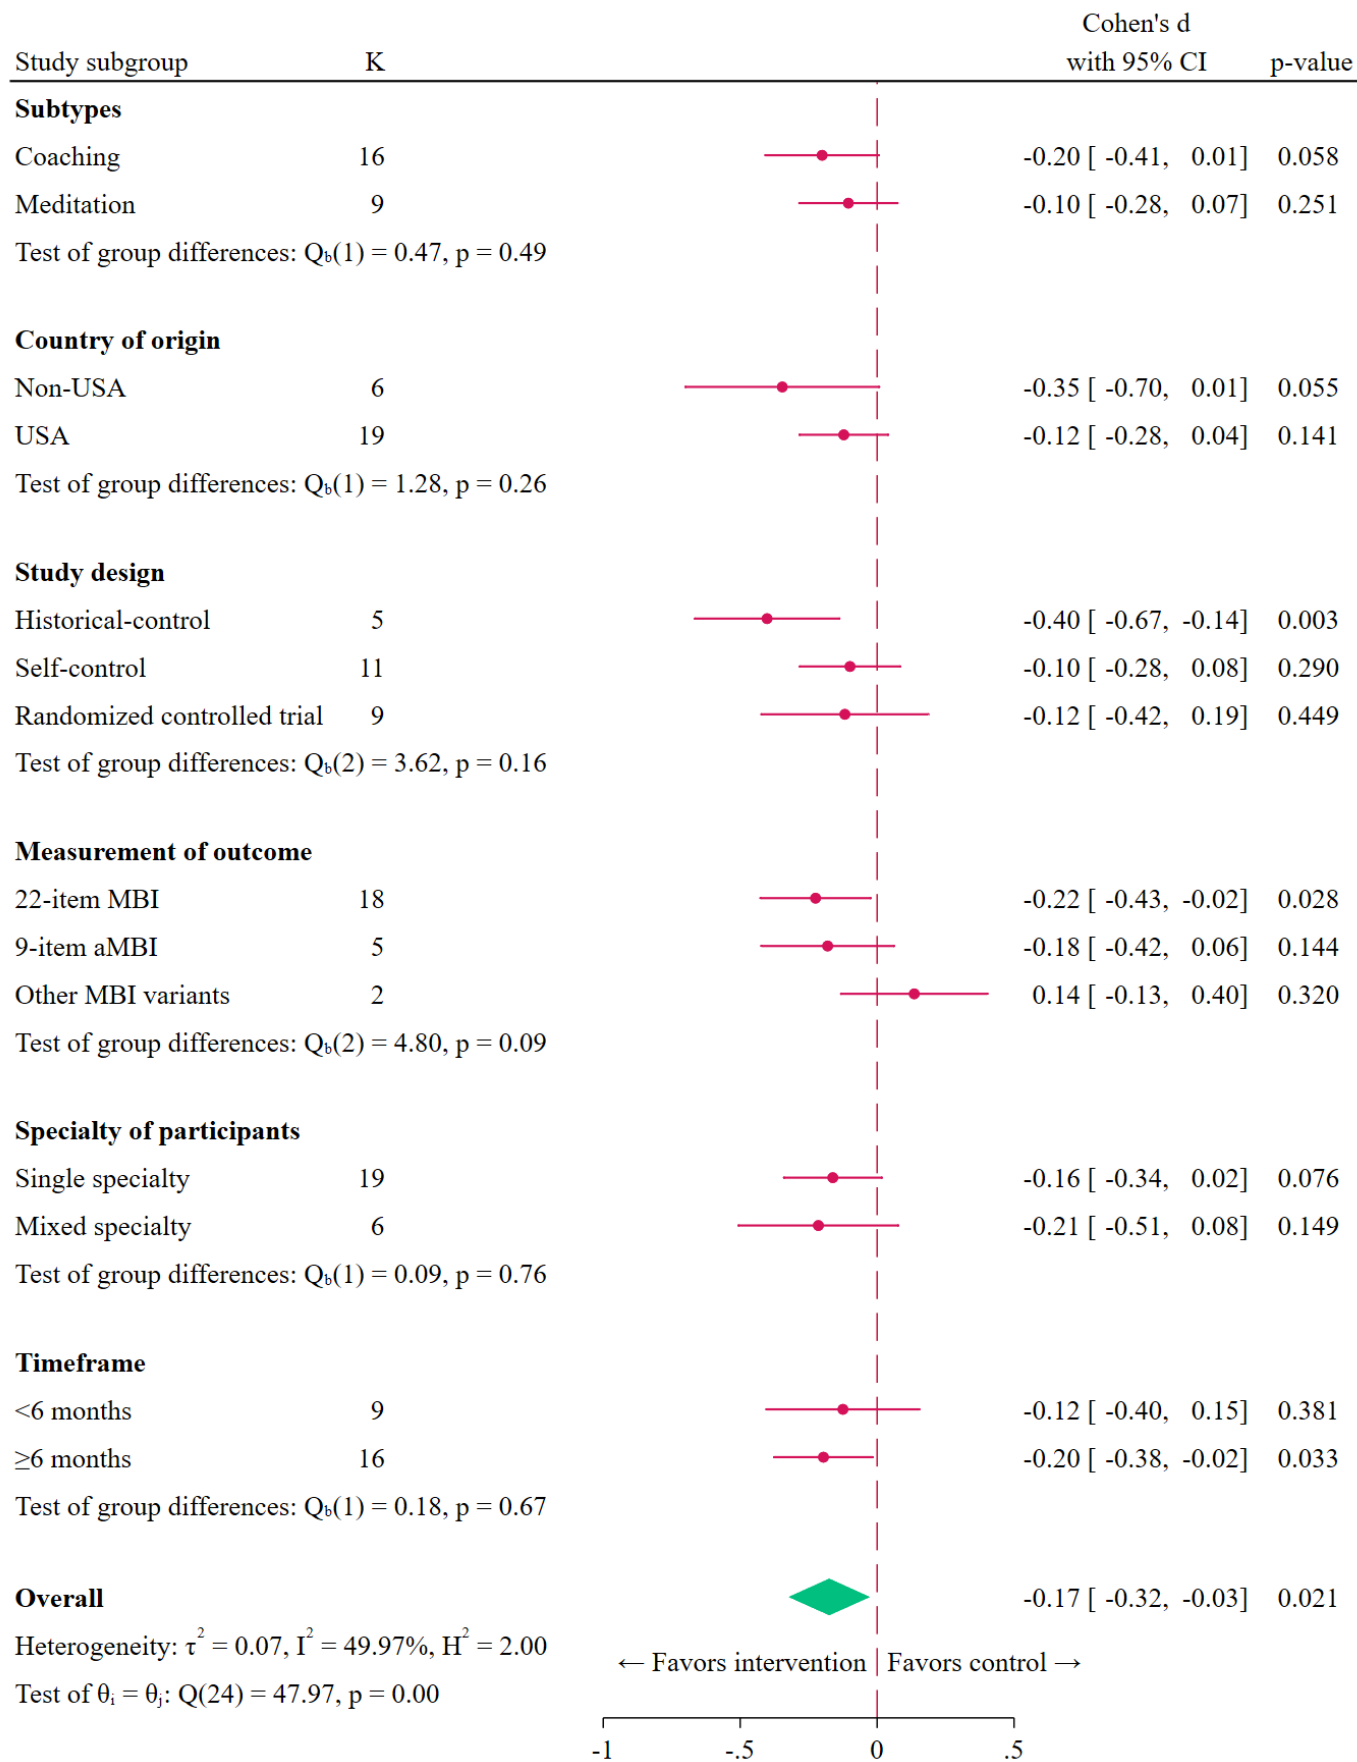

Random-effects DerSimonian–Laird model

**Supplementary Appendix 2.3.** Subgroup meta-analysis of post-intervention standardized mean difference of PA score in individual intervention studies

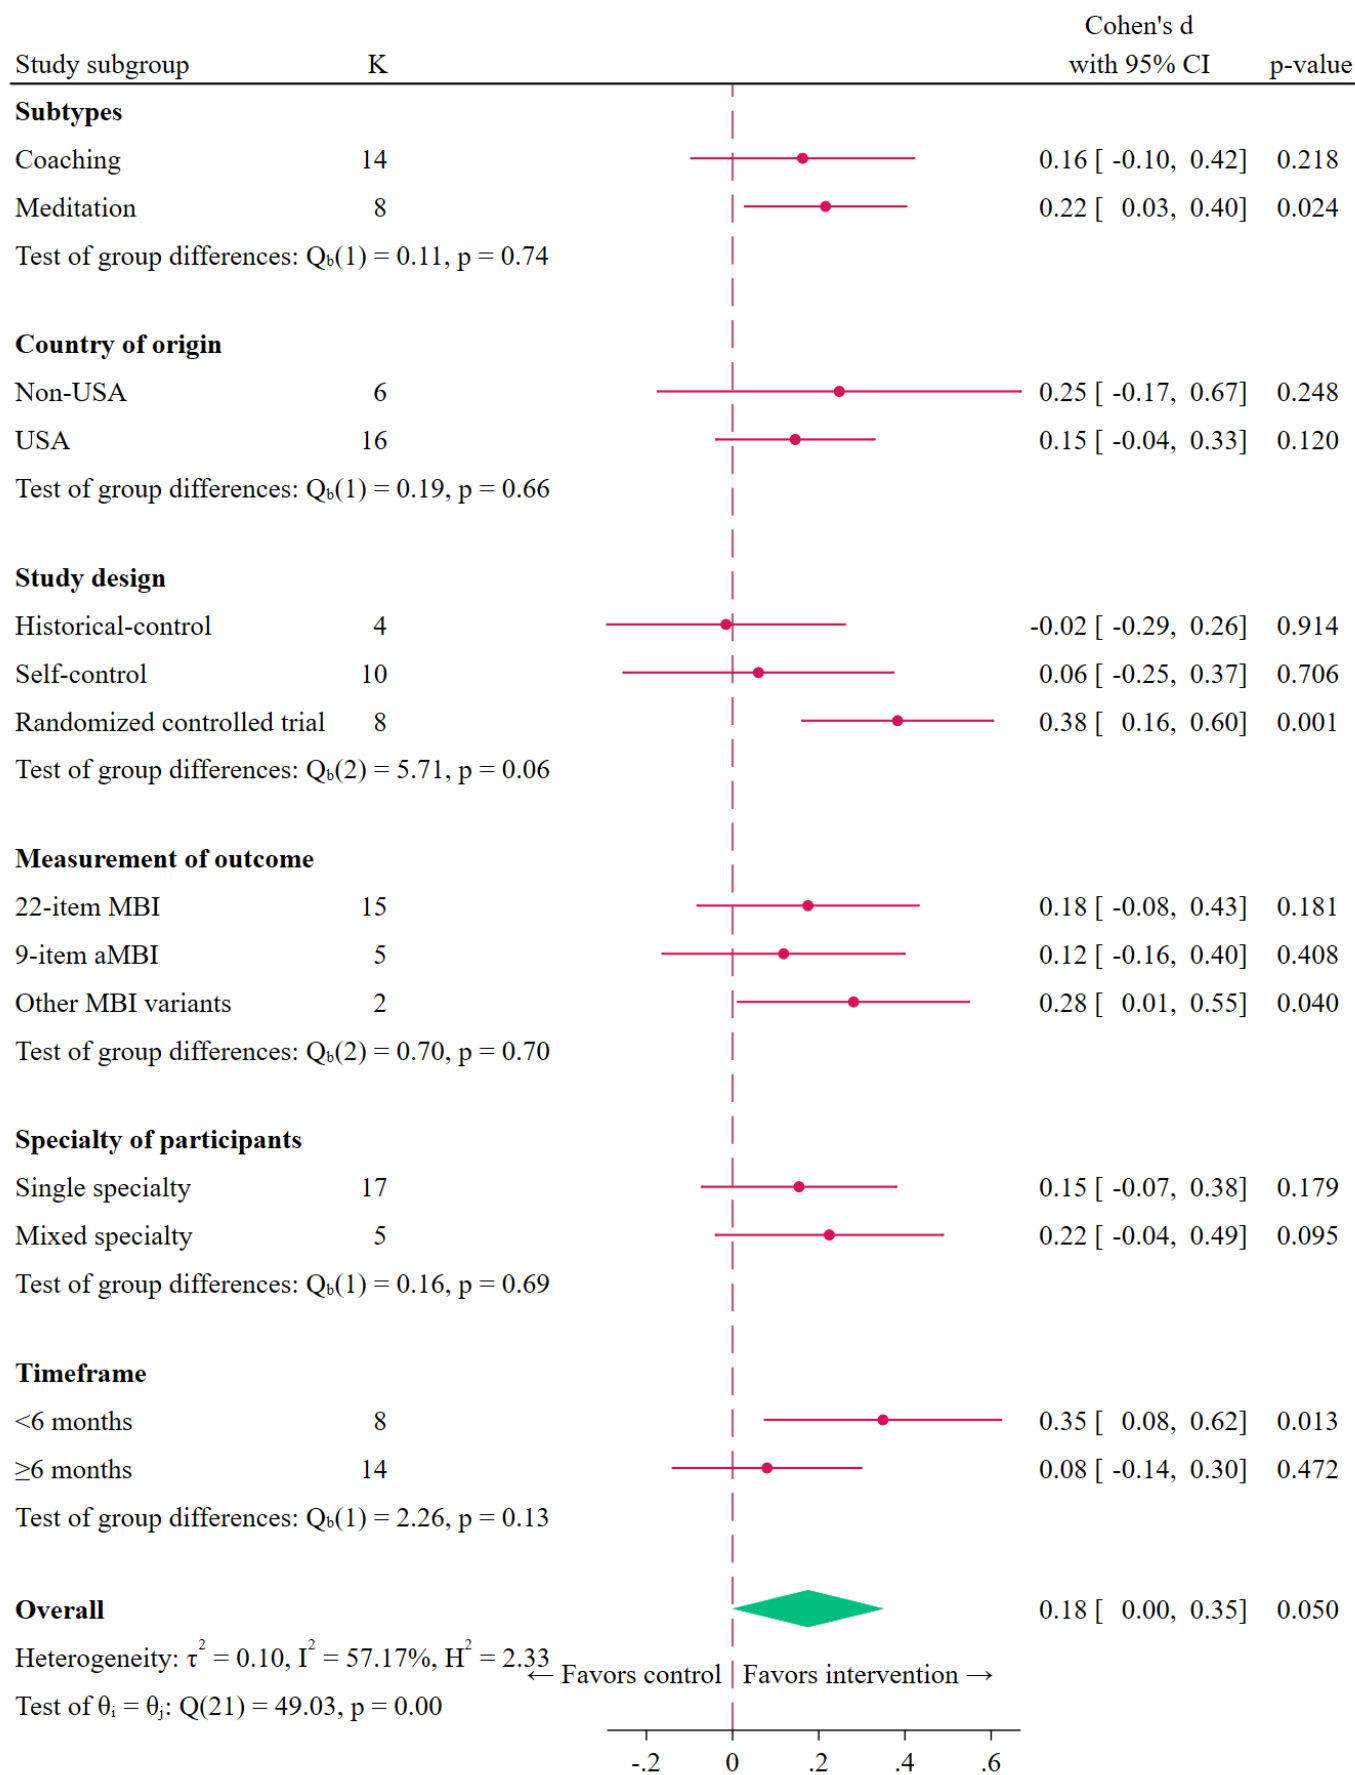

Random-effects DerSimonian–Laird model

**Supplementary Appendix 2.4.** Subgroup meta-analysis of post-intervention standardized mean difference of EE score in organizational intervention studies

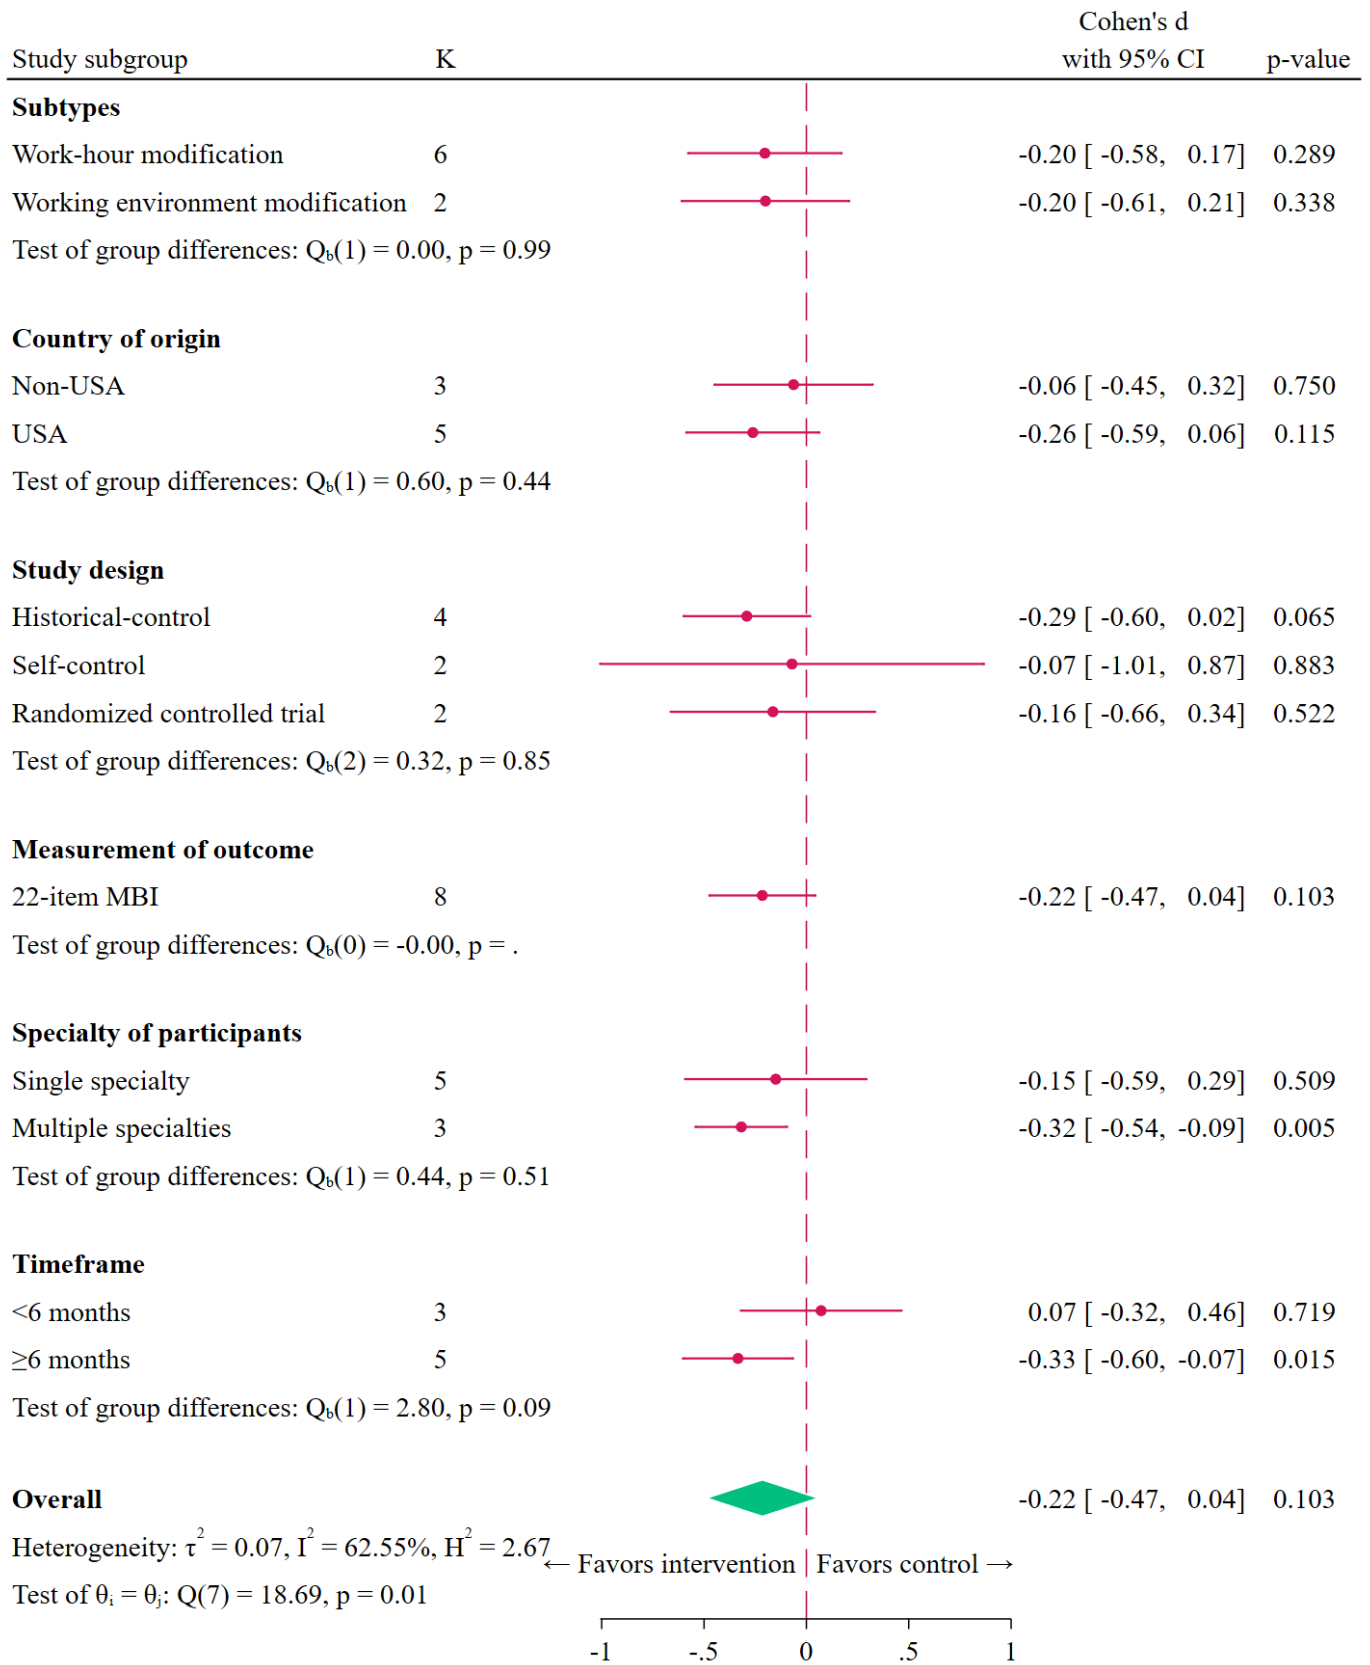

Random-effects DerSimonian–Laird model

**Supplementary Appendix 2.5.** Subgroup meta-analysis of post-intervention standardized mean difference of DP score in organizational intervention studies

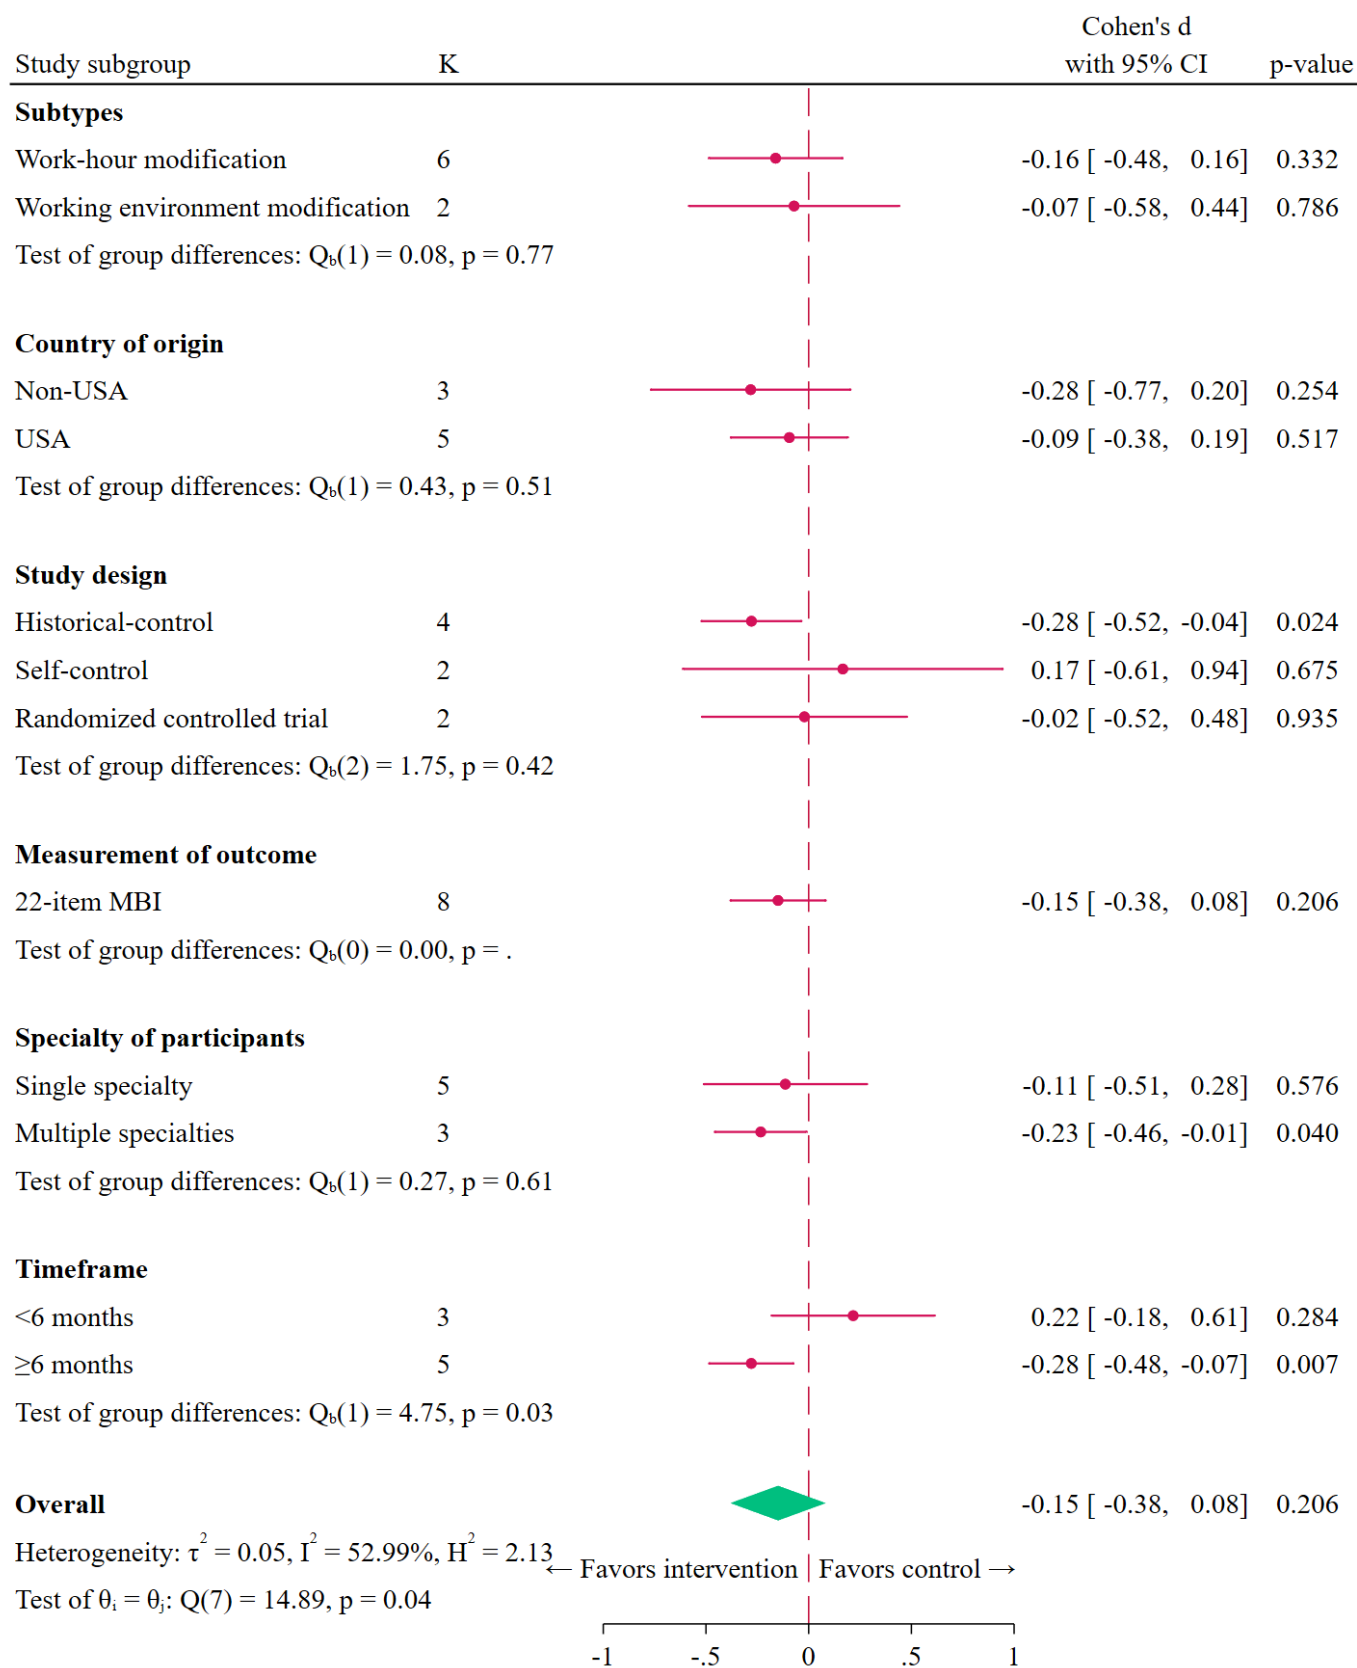

Random-effects DerSimonian–Laird model



**Supplementary Appendix 2.6.** Subgroup meta-analysis of post-intervention standardized mean difference of PA score in organizational intervention studies

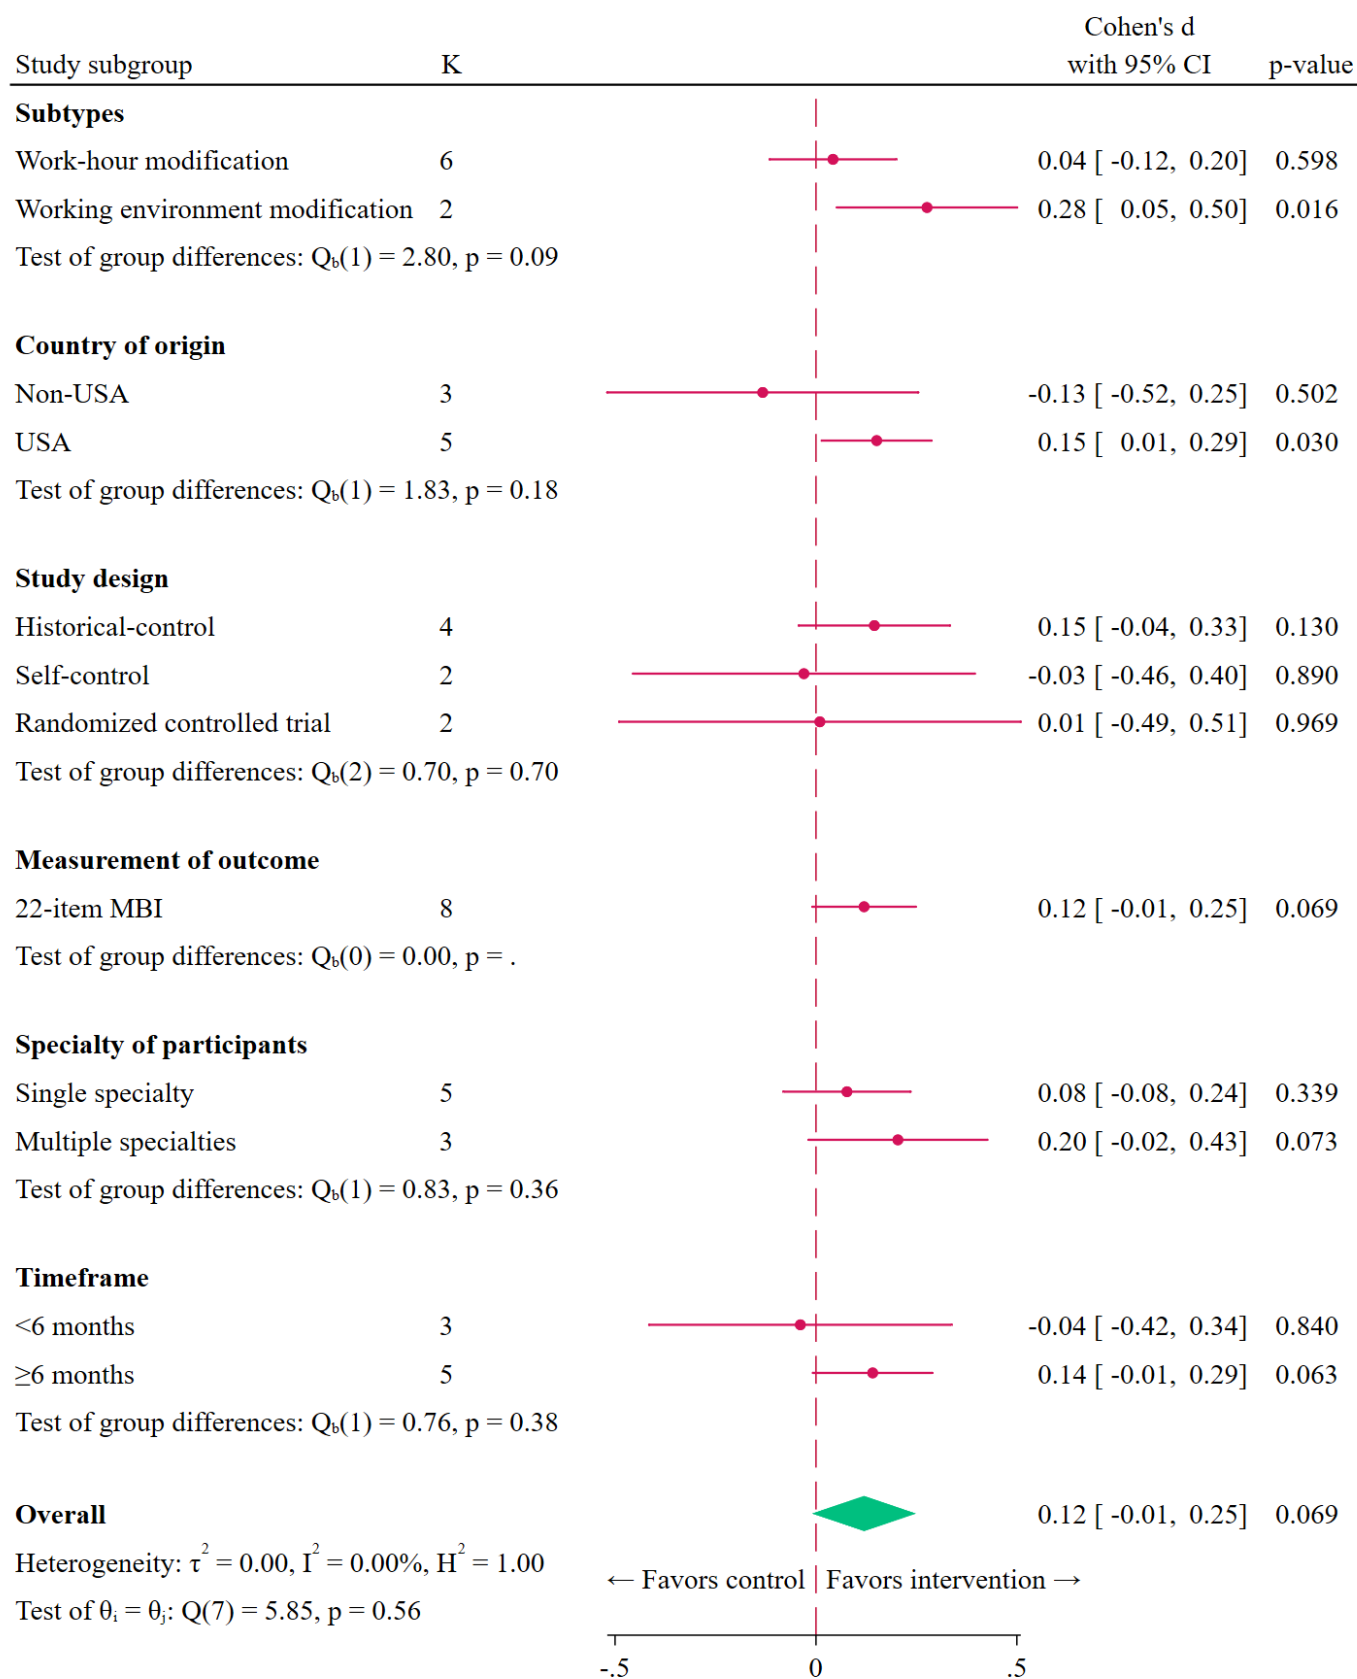

Random-effects DerSimonian–Laird model

**Supplementary Appendix 3.1.** Sensitivity analyses by leave-one-out method for standardized mean difference of EE score in individual intervention studies

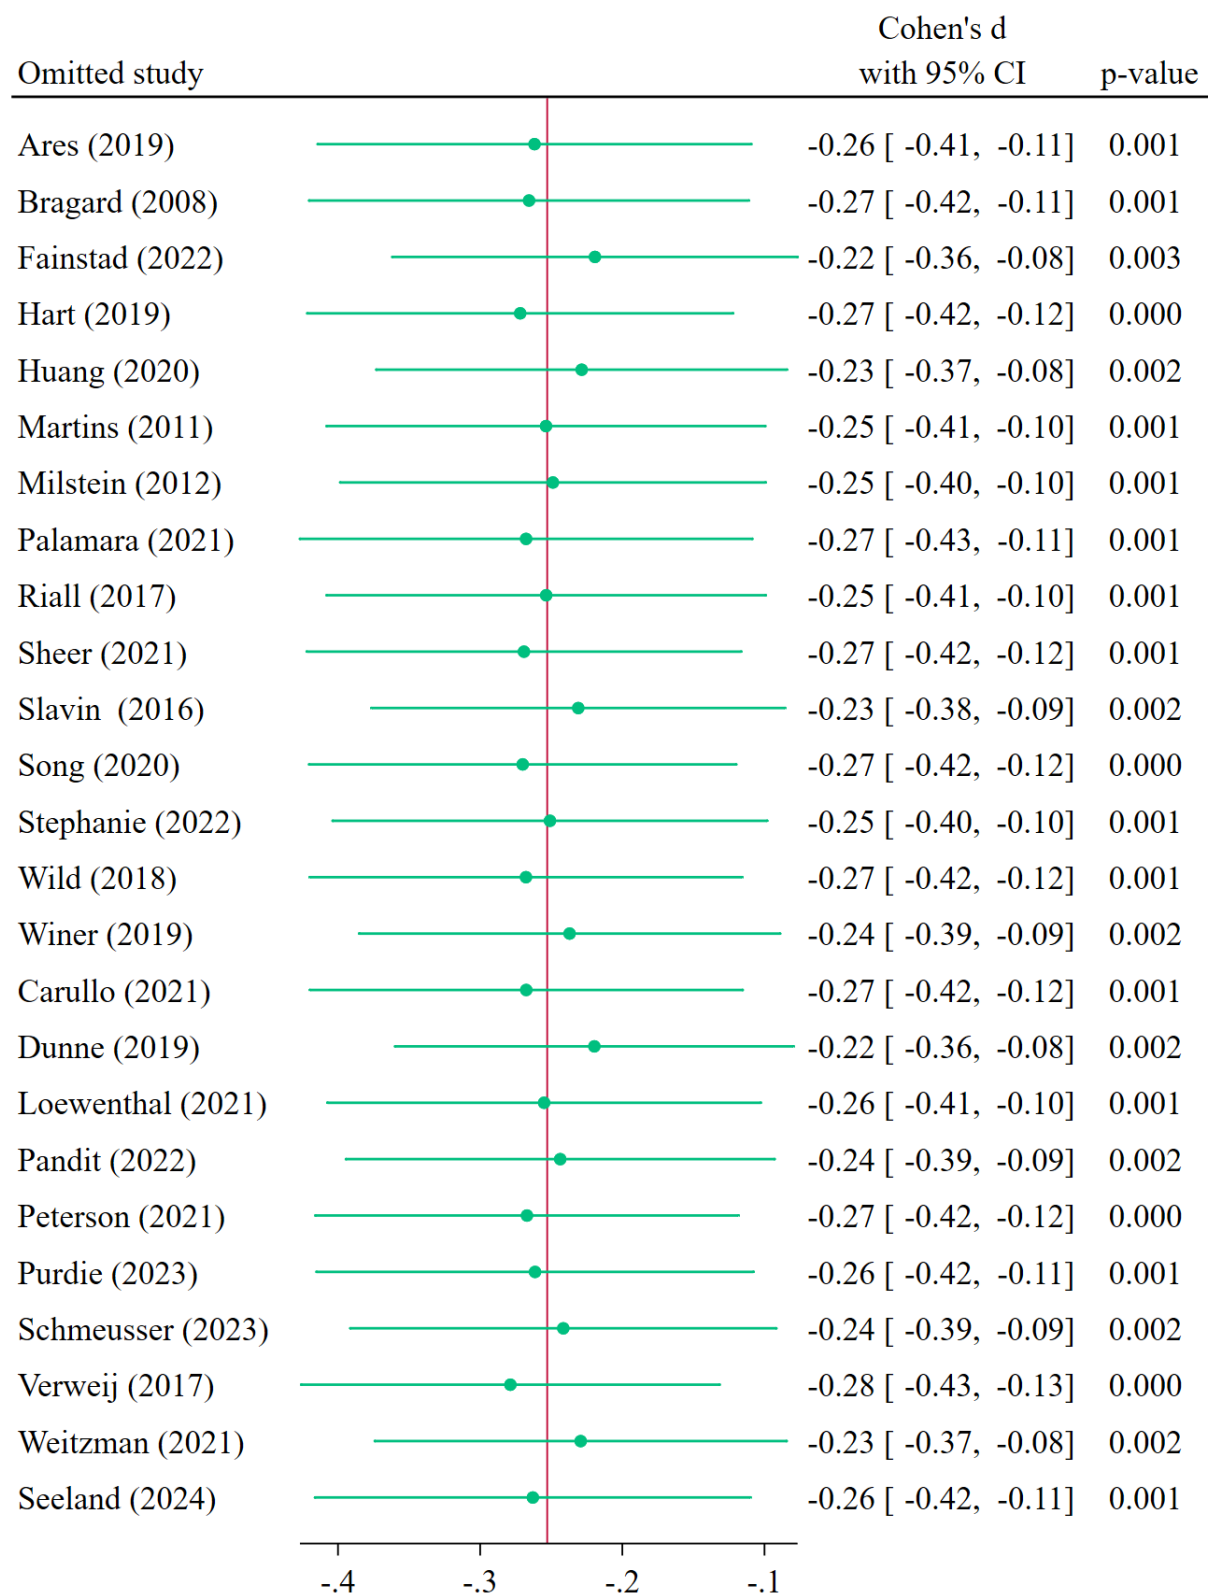

Random-effects DerSimonian–Laird model

**Supplementary Appendix 3.2.** Sensitivity analyses by leave-one-out method for standardized mean difference of DP score in individual intervention studies

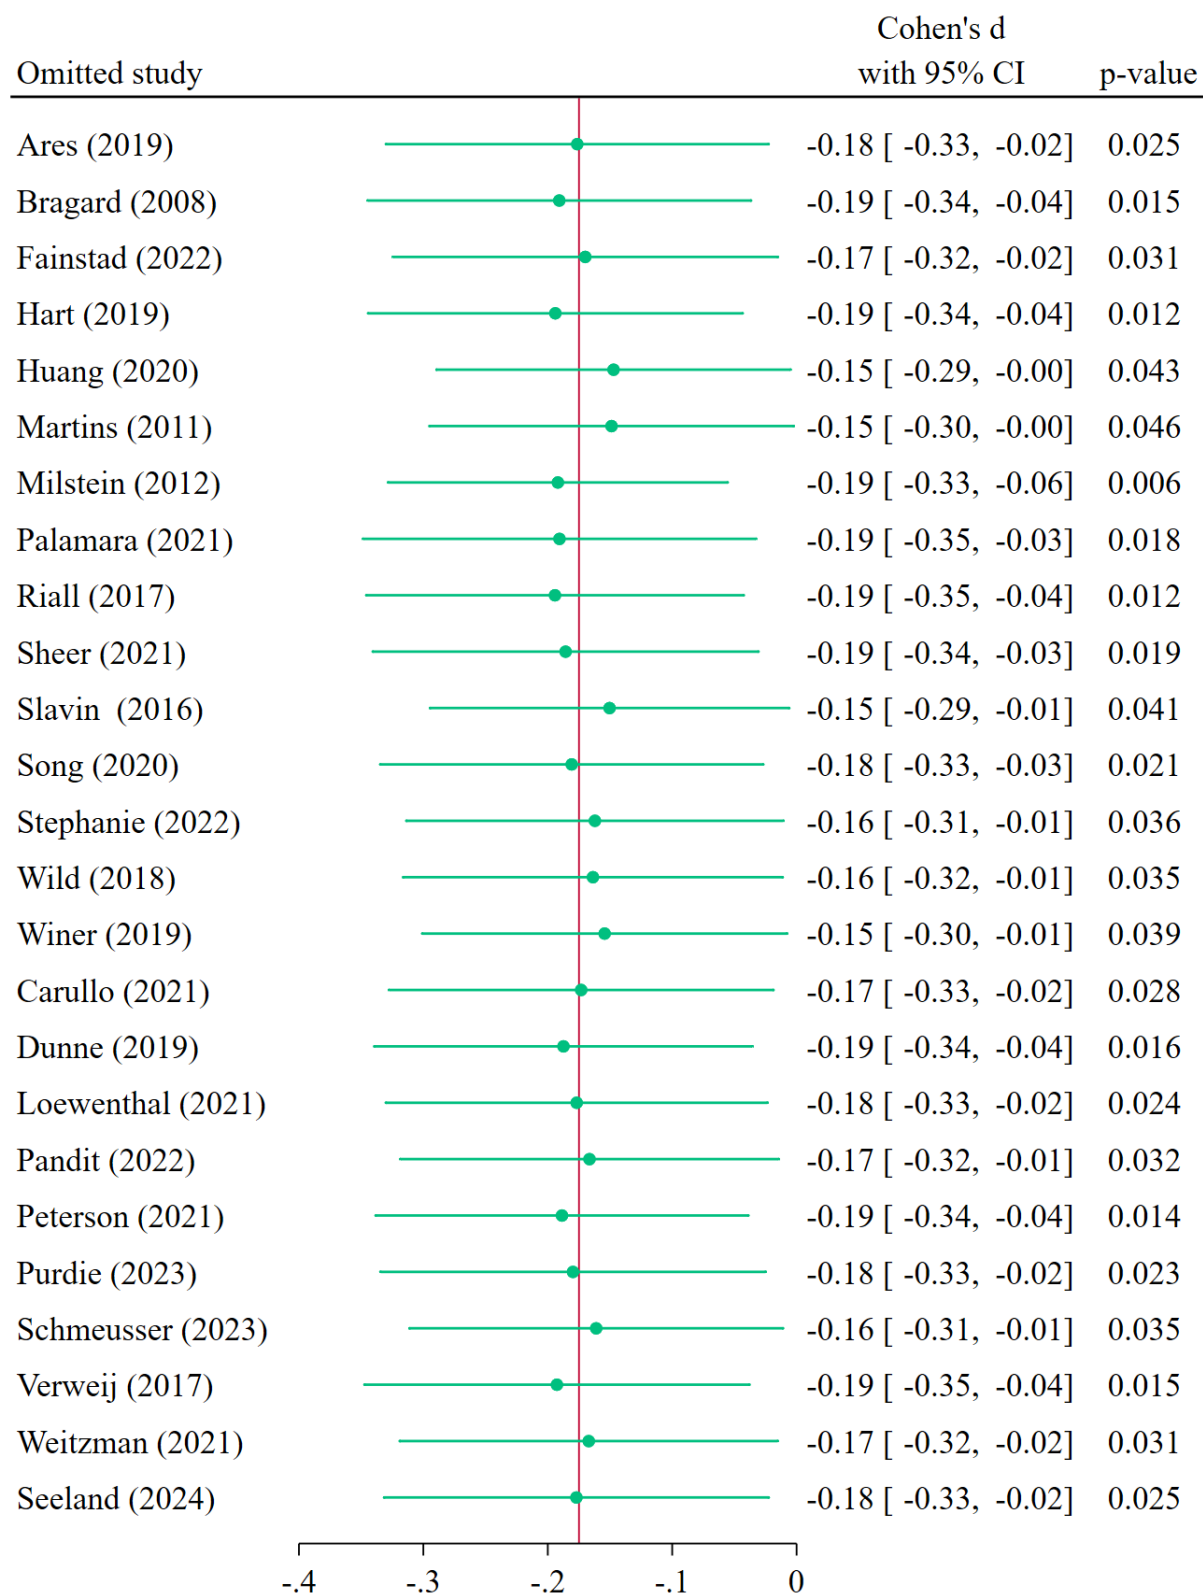

Random-effects DerSimonian–Laird model

**Supplementary Appendix 3.3.** Sensitivity analyses by leave-one-out method for standardized mean difference of PA score in individual intervention studies

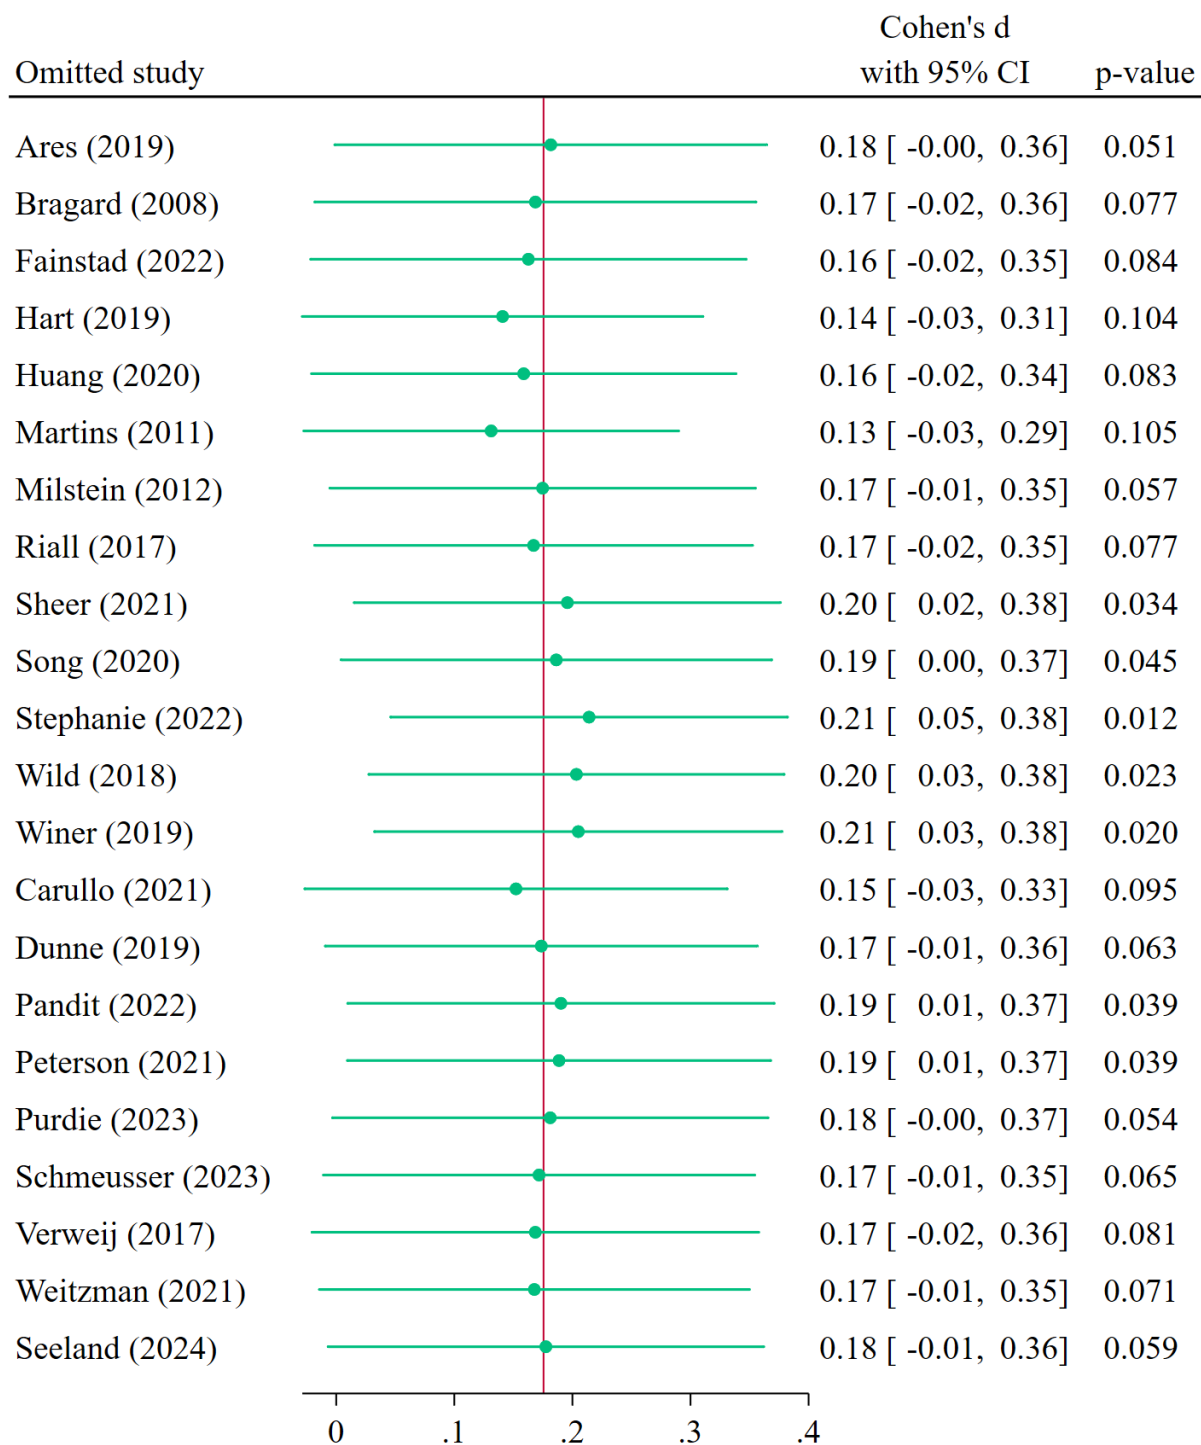

Random-effects DerSimonian–Laird model

**Supplementary Appendix 3.4.** Sensitivity analyses by leave-one-out method for standardized mean difference of EE score in organizational intervention studies

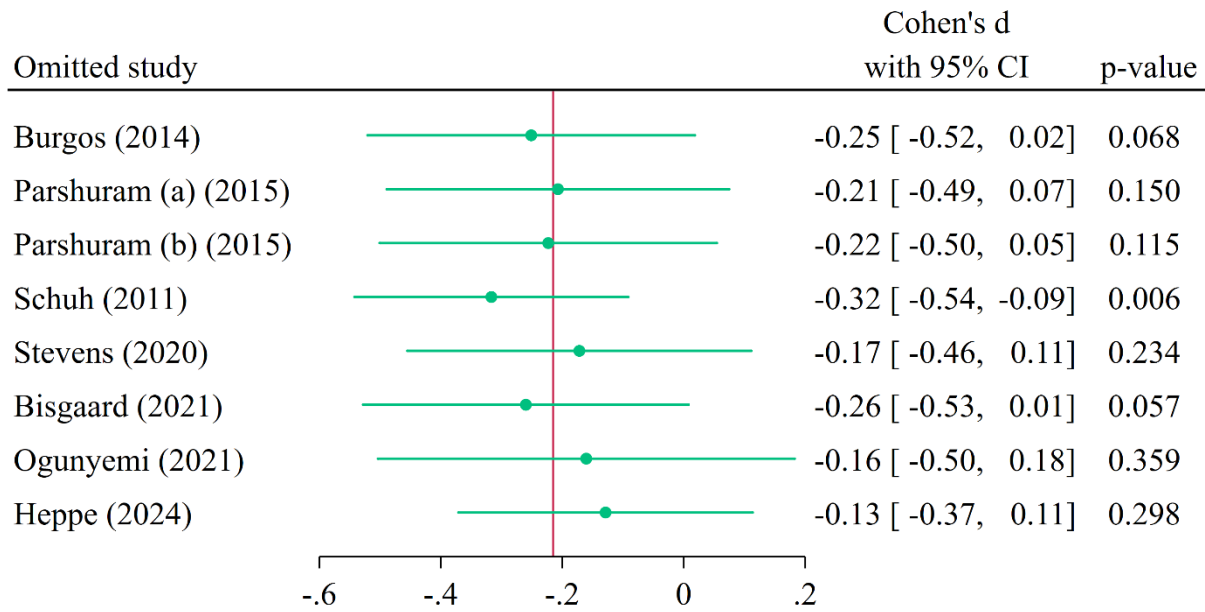

Random-effects DerSimonian–Laird model

**Supplementary Appendix 3.5.** Sensitivity analyses by leave-one-out method for standardized mean difference of DP score in organizational intervention studies

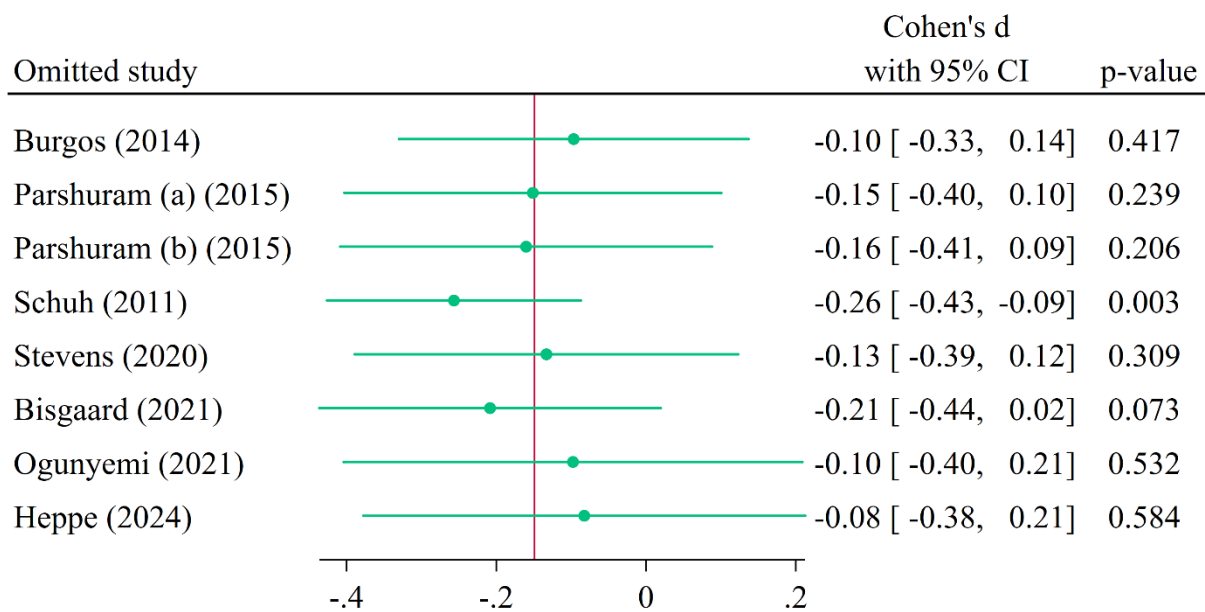

Random-effects DerSimonian–Laird model

**Supplementary Appendix 3.6.** Sensitivity analyses by leave-one-out method for standardized mean difference of PA score in organizational intervention studies

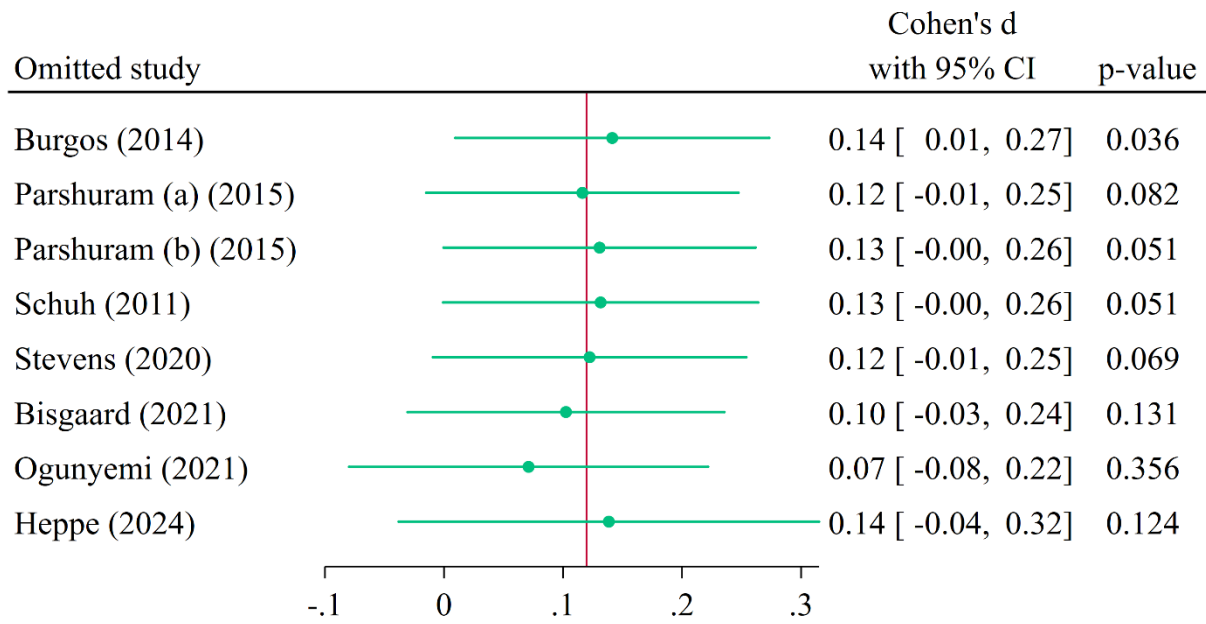

Random-effects DerSimonian–Laird model

**Supplementary Appendix 4.1.** Funnel plot of standardized mean difference of EE score in individual intervention studies

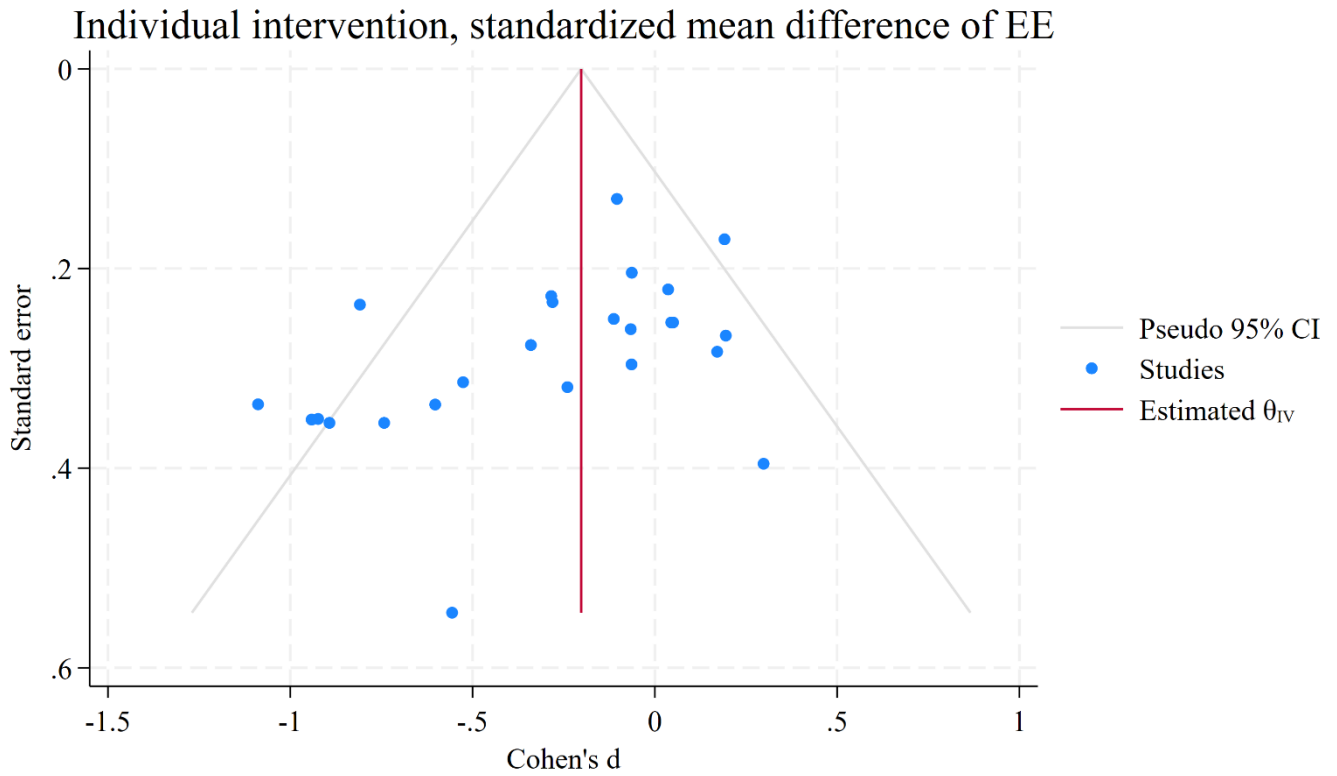

**Supplementary Appendix 4.2.** Funnel plot of standardized mean difference of DP score in individual intervention studies

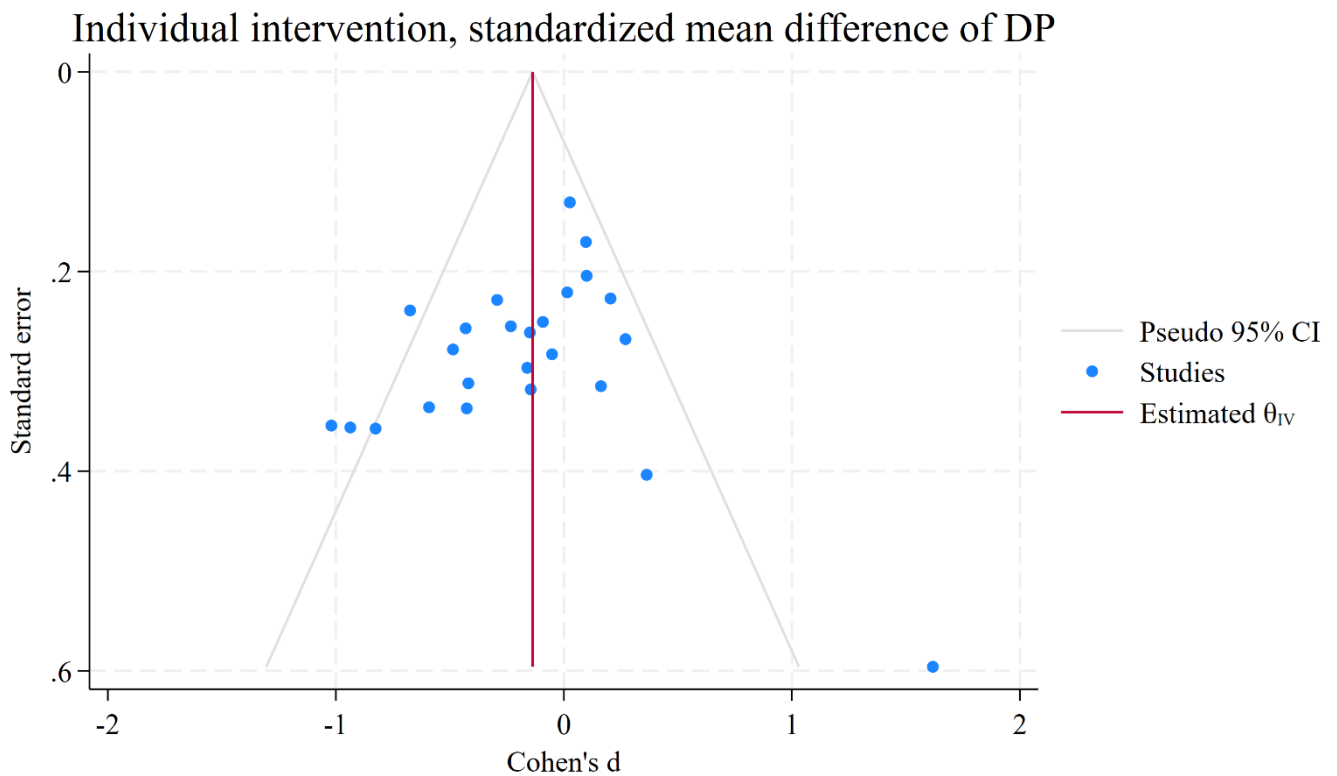

**Supplementary Appendix 4.3.** Funnel plot of standardized mean difference of PA score in individual intervention studies

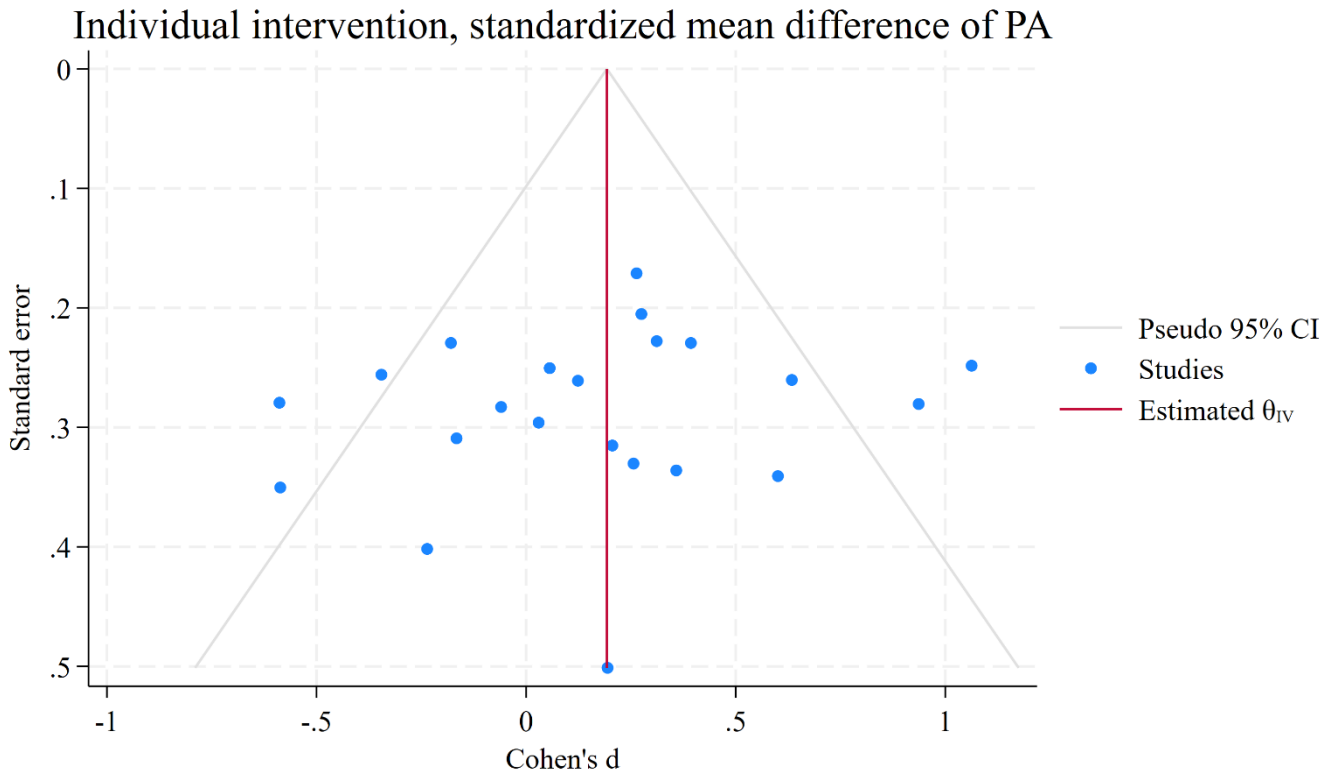

**Supplementary Appendix 4.4.** Funnel plot of standardized mean difference of EE score in organizational intervention studies

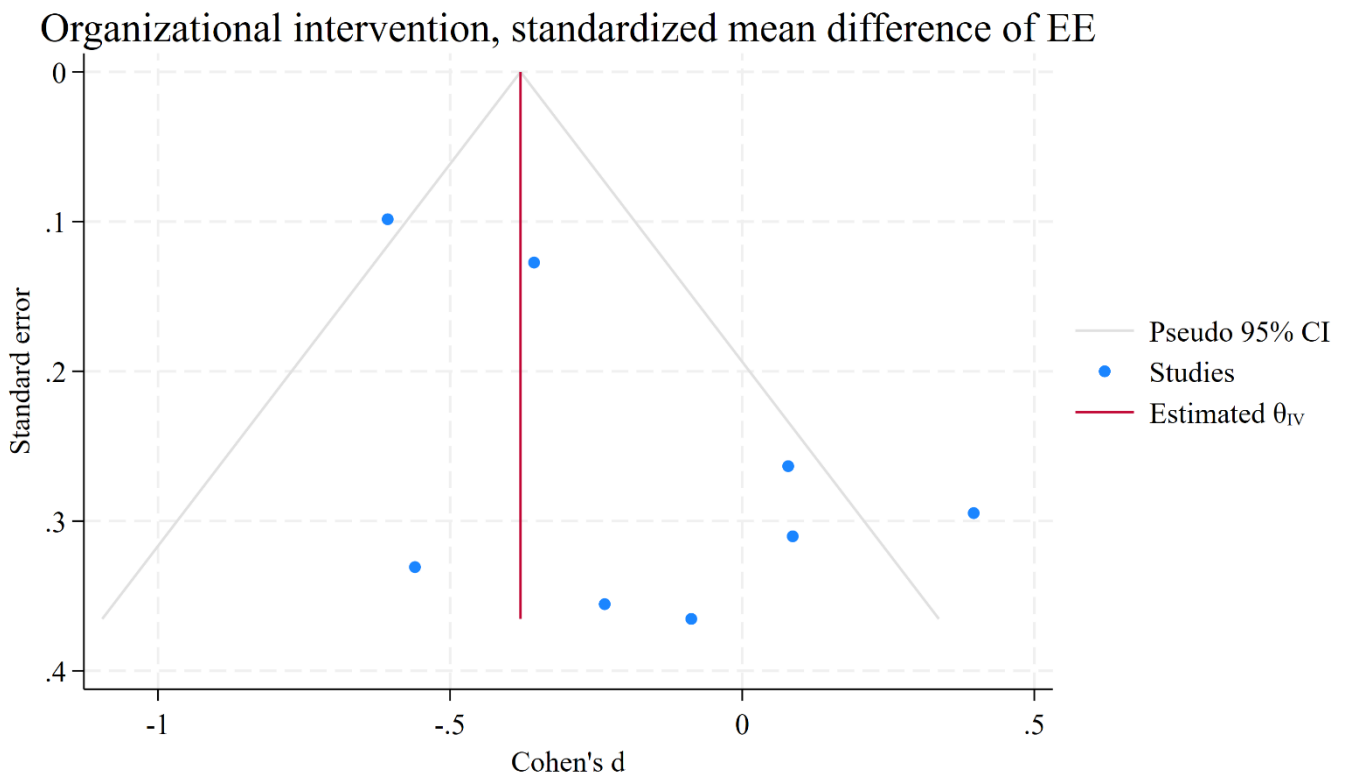



**Supplementary Appendix 4.5.** Funnel plot of standardized mean difference of DP score in organizational intervention studies

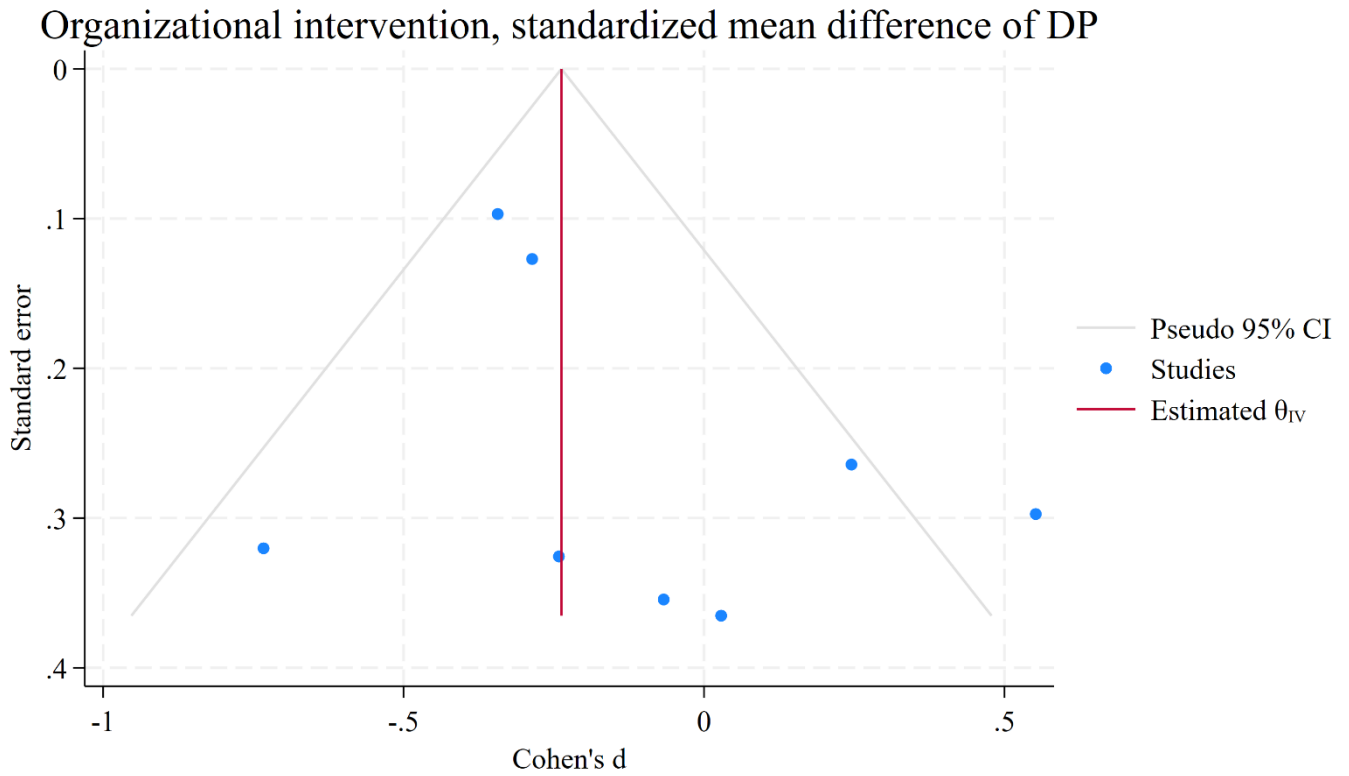

**Supplementary Appendix 4.6.** Funnel plot of standardized mean difference of PA score in organizational intervention studies

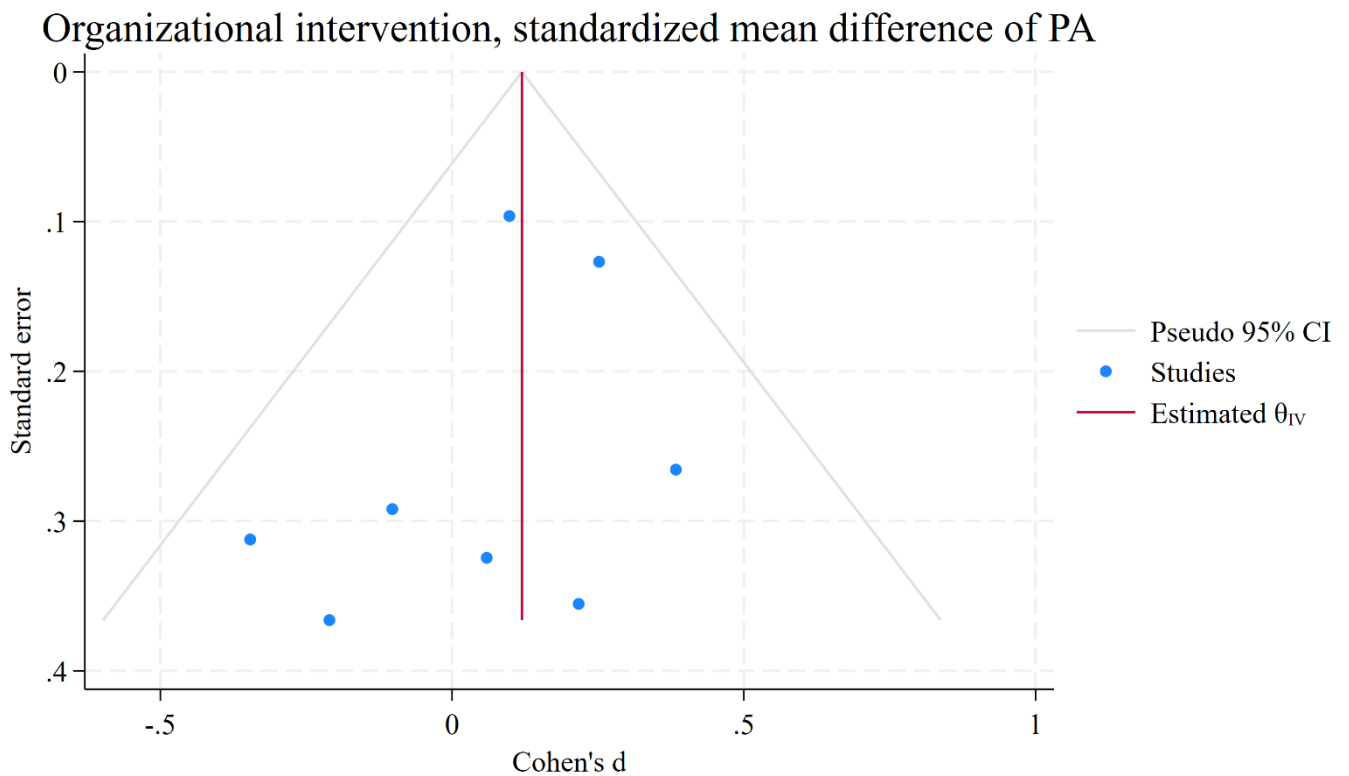

## Supplementary Appendix 5.1. Summary of the risk of bias assessment by Cochrane's RoB2 across 11 randomized controlled concurrent studies

| Study                | Risk of bias domains |    |    |    |    | Overall |
|----------------------|----------------------|----|----|----|----|---------|
|                      | D1                   | D2 | D3 | D4 | D5 |         |
| Bragard (2008)       | ⊖                    | ⊗  | ⊖  | ⊗  | ⊕  | ⊗       |
| Dunne (2019)         | ⊖                    | ⊗  | ⊗  | ⊗  | ⊕  | ⊗       |
| Fainstad (2022)      | ⊖                    | ⊕  | ⊕  | ⊗  | ⊕  | ⊗       |
| Huang (2020)         | ⊖                    | ⊕  | ⊕  | ⊗  | ⊕  | ⊗       |
| Loewenthal (2021)    | ⊖                    | ⊗  | ⊗  | ⊗  | ⊕  | ⊗       |
| Martins (2011)       | ⊖                    | ⊕  | ⊕  | ⊗  | ⊕  | ⊗       |
| Milstein (2012)      | ⊖                    | ⊕  | ⊕  | ⊗  | ⊕  | ⊗       |
| Parshuram (a) (2015) | ⊖                    | ⊗  | ⊖  | ⊗  | ⊕  | ⊗       |
| Parshuram (b) (2015) | ⊖                    | ⊗  | ⊖  | ⊗  | ⊕  | ⊗       |
| Purdie (2023)        | ⊖                    | ⊕  | ⊕  | ⊗  | ⊕  | ⊗       |
| Verweij (2017)       | ⊕                    | ⊗  | ⊗  | ⊗  | ⊕  | ⊗       |

Domains:  
D1: Bias arising from the randomization process.  
D2: Bias due to deviations from intended intervention.  
D3: Bias due to missing outcome data.  
D4: Bias in measurement of the outcome.  
D5: Bias in selection of the reported result.

Judgement  
⊗ High  
⊖ Some concerns  
⊕ Low

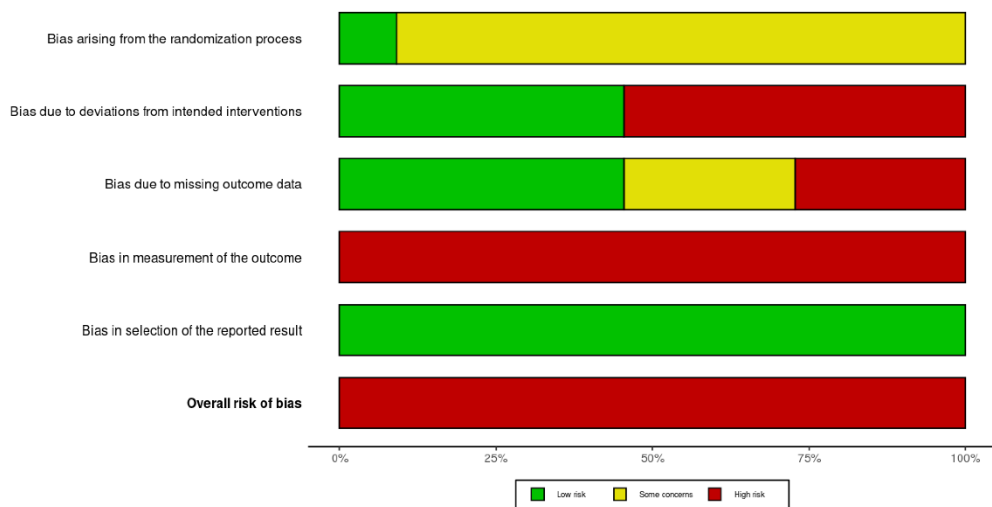

**Supplementary Appendix 5.2.** Summary of the risk of bias assessment by Cochrane’s ROBINS-I across 22 non-randomized studies

| Study             | Risk of bias domains |    |    |    |    |    |    | Overall |
|-------------------|----------------------|----|----|----|----|----|----|---------|
|                   | D1                   | D2 | D3 | D4 | D5 | D6 | D7 |         |
| Ares (2019)       | ⊗                    | +  | +  | +  | -  | ⊗  | +  | ⊗       |
| Bateman (2024)    | -                    | +  | +  | +  | -  | ⊗  | +  | ⊗       |
| Bisgaard (2021)   | ⊗                    | +  | +  | +  | -  | ⊗  | +  | ⊗       |
| Burgos (2014)     | ⊗                    | +  | +  | +  | ⊗  | ⊗  | +  | ⊗       |
| Carullo (2021)    | -                    | +  | +  | +  | ⊗  | ⊗  | +  | ⊗       |
| Hart (2019)       | -                    | +  | +  | +  | ⊗  | ⊗  | +  | ⊗       |
| Heppe (2024)      | -                    | +  | +  | +  | -  | ⊗  | +  | ⊗       |
| Ogunyemi (2021)   | -                    | +  | +  | +  | -  | ⊗  | +  | ⊗       |
| Palamara (2021)   | -                    | +  | +  | +  | -  | ⊗  | +  | ⊗       |
| Pandit (2022)     | -                    | +  | +  | +  | +  | ⊗  | +  | ⊗       |
| Peterson (2021)   | -                    | +  | +  | +  | -  | ⊗  | +  | ⊗       |
| Riall (2017)      | -                    | +  | +  | +  | -  | ⊗  | +  | ⊗       |
| Schmeusser (2023) | ⊗                    | +  | +  | +  | -  | ⊗  | +  | ⊗       |
| Schuh (2011)      | -                    | +  | +  | +  | ⊗  | ⊗  | +  | ⊗       |
| Sheer (2021)      | -                    | +  | +  | +  | -  | ⊗  | +  | ⊗       |
| Slavin (2016)     | ⊗                    | +  | +  | +  | +  | ⊗  | +  | ⊗       |
| Song (2020)       | -                    | +  | +  | +  | +  | ⊗  | +  | ⊗       |
| Stephanie (2022)  | ⊗                    | +  | +  | +  | ⊗  | ⊗  | +  | ⊗       |
| Stevens (2020)    | -                    | +  | +  | +  | +  | ⊗  | +  | ⊗       |
| Weitzman (2021)   | -                    | +  | +  | +  | ⊗  | ⊗  | +  | ⊗       |
| Wild (2018)       | ⊗                    | +  | +  | +  | -  | ⊗  | +  | ⊗       |
| Winer (2019)      | -                    | +  | +  | +  | ⊗  | ⊗  | +  | ⊗       |

Domains:  
D1: Bias due to confounding.  
D2: Bias due to selection of participants.  
D3: Bias in classification of interventions.  
D4: Bias due to deviations from intended interventions.  
D5: Bias due to missing data.  
D6: Bias in measurement of outcomes.  
D7: Bias in selection of the reported result.

Judgement  
⊗ Serious  
- Moderate  
+ Low

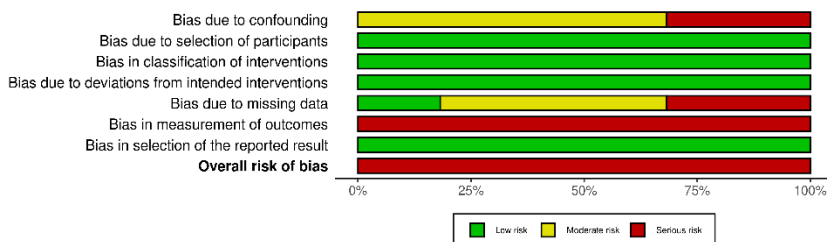

Supplement: 12909_2024_6195_MOESM1_ESM.pdf [file 12909_2024_6195_MOESM1_ESM.pdf]
